# Supplementary material for: A genetically inducible porcine model of intestinal cancer
Source: PubMed Central journal article supplement (PMC5664002; doi:10.1002/1878-0261.12136), 2017-10-10
Supplement: MOL2-11-1616-s003.pdf [file MOL2-11-1616-s003.pdf]

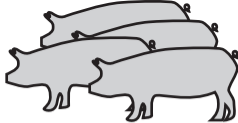

13 oncopigs

failed to thrive (n=2)

### Model validation

Euthanized untreated pigs

Searched for spontaneous cancer

Screened for cassette expression (IVIS and RT-qPCR)

n=5

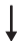

no lesions

n=5

### Proof of principle study

Systemic tamoxifen treatment

n=3

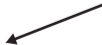

lesion

n=1

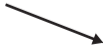

no-lesions

n=2

### Untreated

For breeding and future studies

n=3
