# Supplementary material for: A genetically inducible porcine model of intestinal cancer
Source: PubMed Central journal article supplement (PMC5664002; doi:10.1002/1878-0261.12136), 2017-10-10

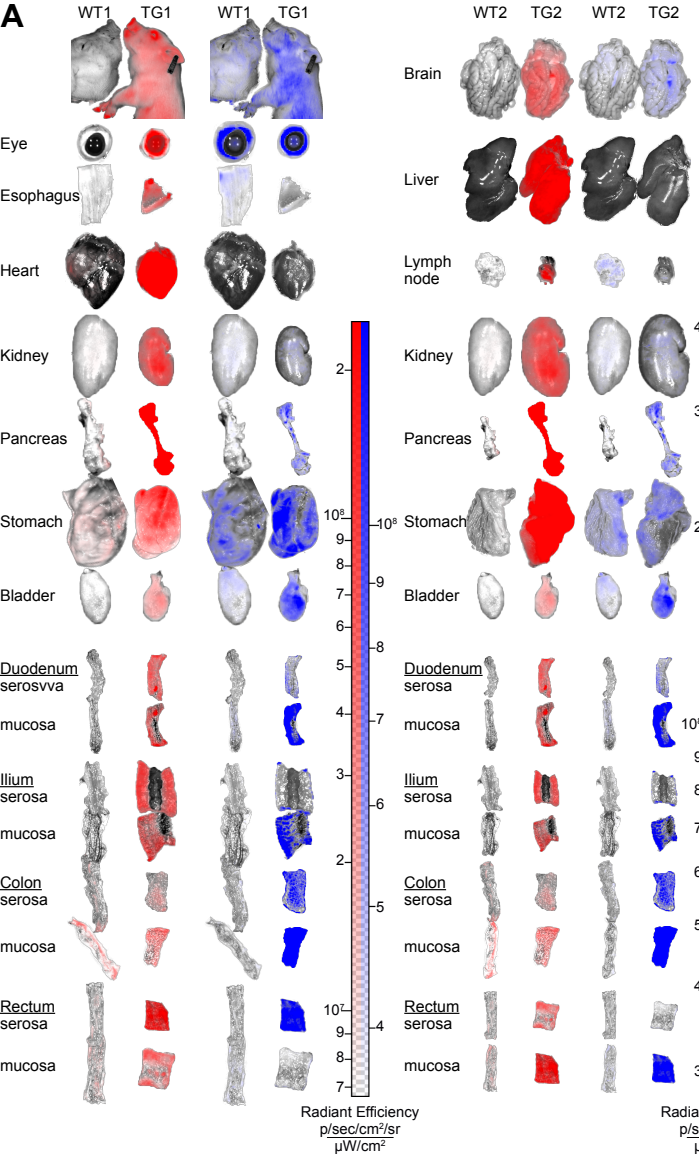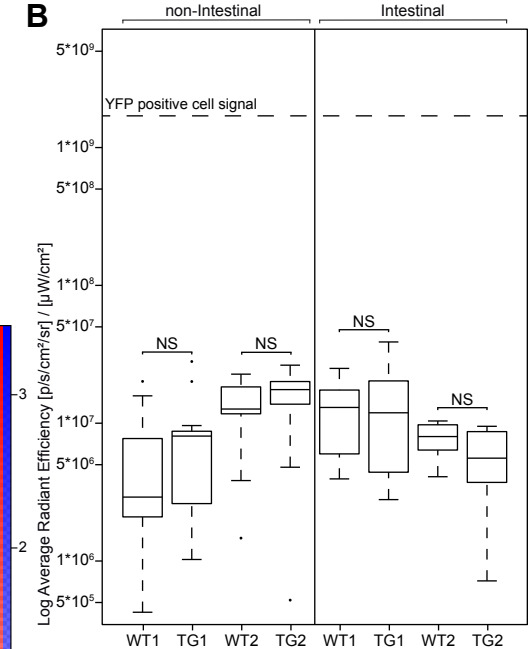

Supplement: MOL2-11-1616-s004.pdf [file MOL2-11-1616-s004.pdf]
